# Supplementary material for: A 1900 Year Sediment Record Suggests Recent Establishment of Black Mangrove (Avicennia Germinans) Stands within a Salt Marsh in St. Augustine, Florida, USA
Source: MDPI journal article supplement (doi:10.3390/quat5010002), 2022-01-01
Supplement: s1 [file s1]

## Supplementary Materials

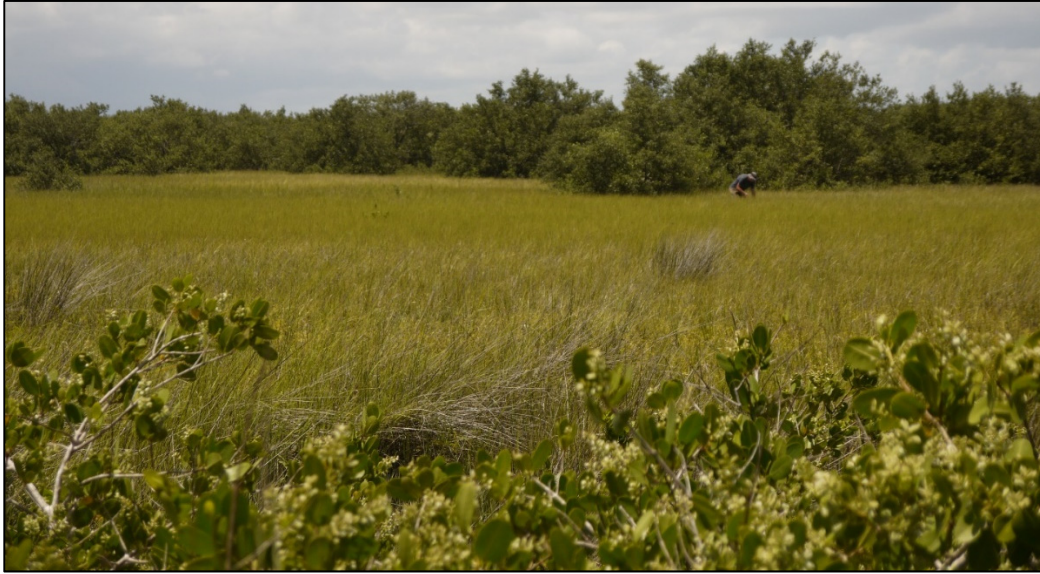

**Figure S1.** Photograph of one of the salt marsh surface sample collection sites at Ponce Preserve Park near Ponce Inlet, FL. The salt marsh location is dominated by *Spartina alterniflora*, with minor *Juncus roemerianus* and less commonly other species. The marsh is bounded by a black mangrove-dominated system (many of the distant mangroves in image), with white and red Mangrove present in minor abundance.

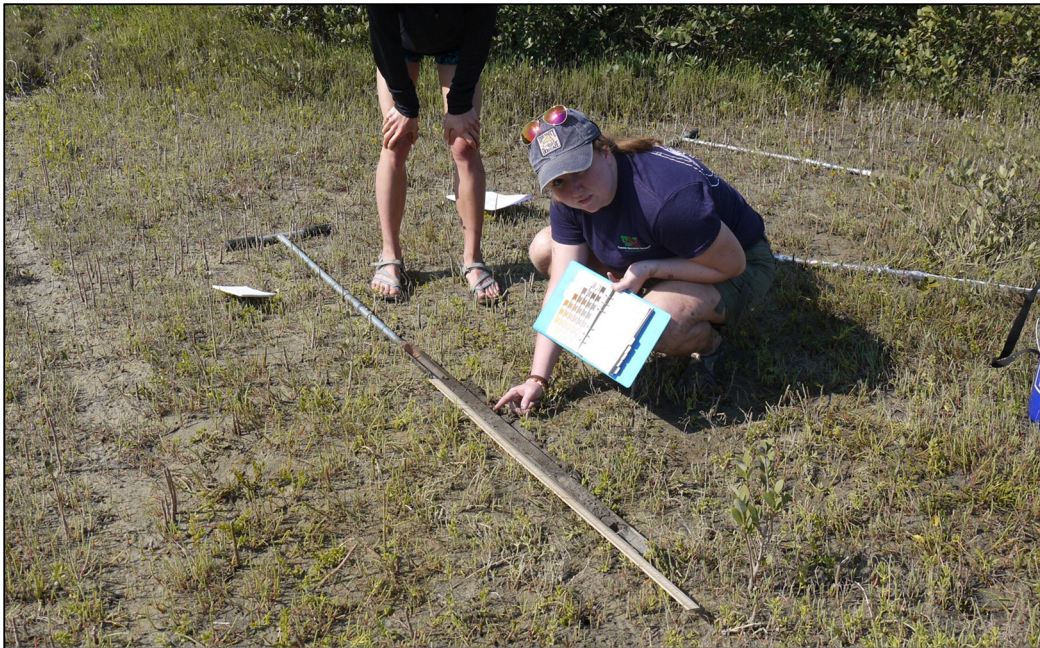

**Figure S2.** Image showing coring apparatus and core description during fieldwork. This particular core was collected from Nease Park near St. Augustine, FL, from within a stand of black Mangroves, just visible towards the upper part of the image.

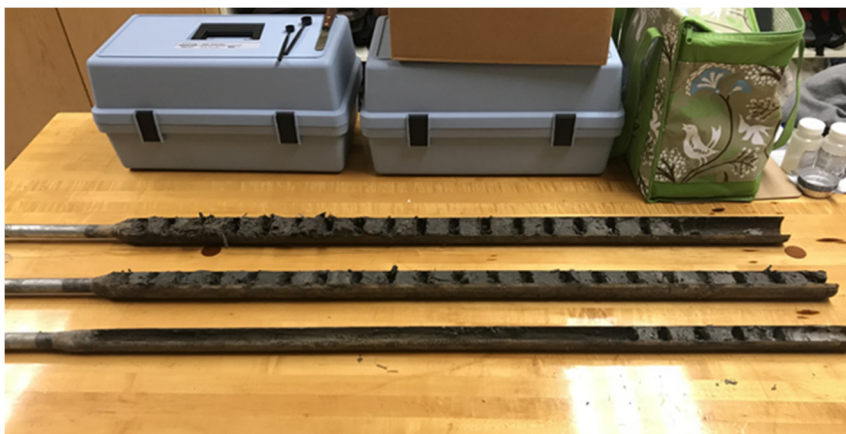

**Figure S3.** Image showing the overlapping soil cores from the Boat Launch site with subsamples removed at every five centimeters. Each core barrel is 1 m in length and the top of each core is to the left (surface is at the top left, and refusal depth is at the bottom, right). Total sampled depth was 205cm.
